# Supplementary material
Source: PubMed Central journal article supplement (PMC3657100)
Supplement: supp_mol.112.084145_KraynikManuscriptSupplementals2-19.pdf [file supp_mol.112.084145_KraynikManuscriptSupplementals2-19.pdf]

*Molecular Pharmacology*

**PDE3B, PDE4, and PDE8A Cooperatively Regulate cAMP-dependent Processes in Mouse Brown Adipose Tissue**

Stephen M. Kraynik, Robert S. Miyaoka, Joseph A. Beavo

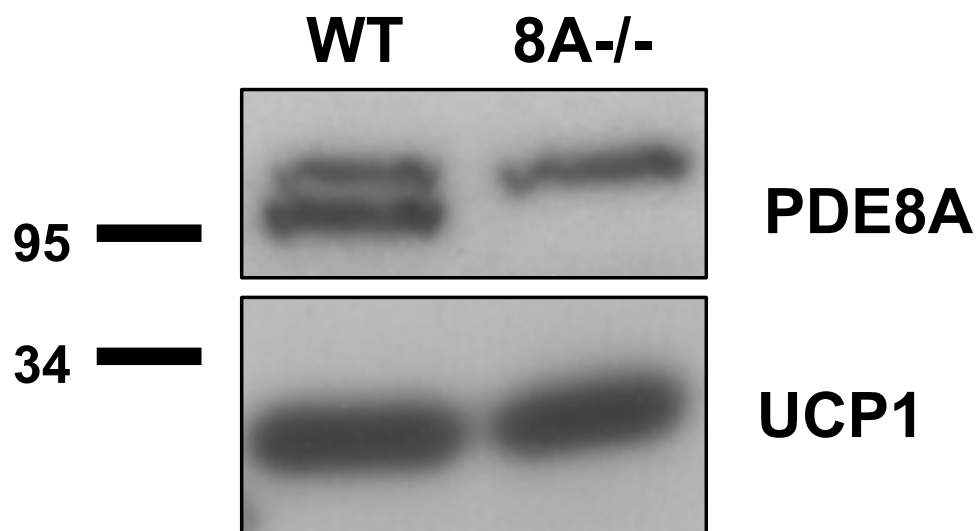

**Supplemental Figure S1. PDE8A protein is present in mouse brown adipose tissue.** Mouse brown adipose tissue was excised and homogenized as described in Materials and Methods. 30  $\mu$ g of protein were loaded onto SDS-PAGE, transferred onto PVDF and blotted for PDE8A and UCP1. An immunoreactive band towards a PDE8A antibody at 95 kDa is present in the wildtype but absent in the PDE8A<sup>-/-</sup> (n=5).

## Molecular Pharmacology

# PDE3B, PDE4, and PDE8A Cooperatively Regulate cAMP-dependent Processes in Mouse Brown Adipose Tissue

Stephen M. Kraynik, Robert S. Miyaoka, Joseph A. Beavo

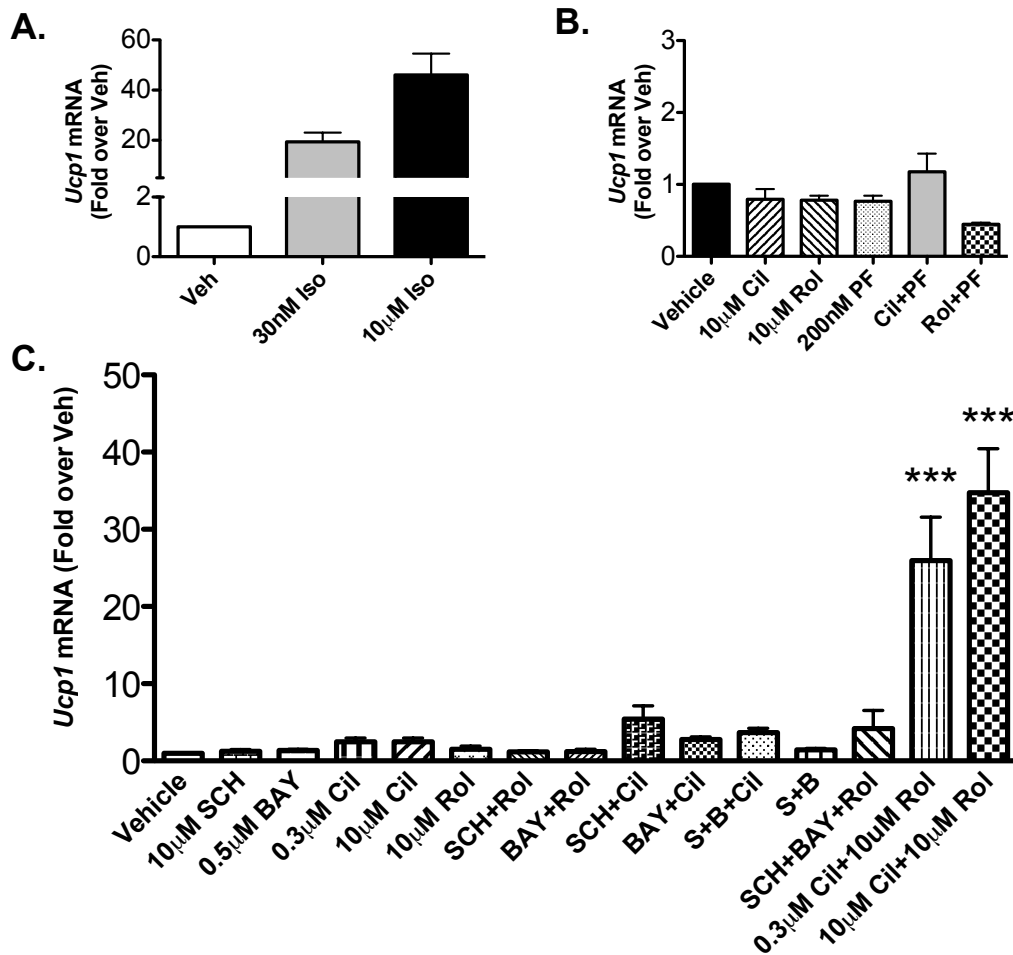

### Supplemental Figure S2. The effects of isoproterenol and PDE inhibitor combinations on UCP1 mRNA expression in differentiated brown adipocytes.

[A] Differentiated brown adipocyte precursors were stimulated with increasing doses of isoproterenol for 4 hours (n=5). [B] Differentiated brown adipocyte precursors were treated with 10 µM cilostamide, 10 µM and/or 200 nM PF-04957325 as described in materials and methods (n=3). [C] Differentiated brown adipocyte precursors were treated with SCH51866, BAY 60-7550, cilostamide, and/or rolipram at the indicated doses as described in materials and methods (n=3-8). RNA was isolated and UCP1 mRNA was quantified relative to 18S mRNA using RT-PCR as described in Materials and Methods. Data are presented as mean fold over vehicle control ± S.E.M., and statistical analyses were performed by One-way ANOVA with Dunnet post hoc test: \*\*\*, p<0.001 versus vehicle control in each group.

**PDE3B, PDE4, and PDE8A Cooperatively Regulate cAMP-dependent Processes in Mouse Brown Adipose Tissue**

Stephen M. Kraynik, Robert S. Miyaoka, Joseph A. Beavo

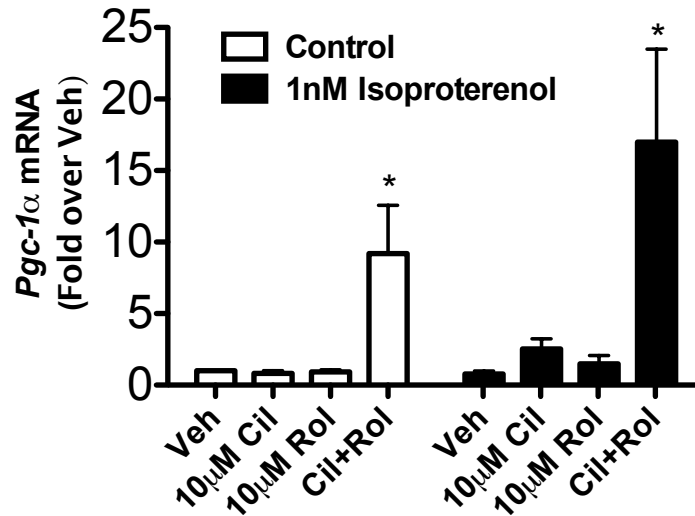

**Supplemental Figure S3. PDE3 and PDE4 inhibitors increase PGC-1α mRNA expression in differentiated brown adipocytes.** PGC-1α mRNA expression was measured in differentiated brown adipocytes that were pretreated with PDE inhibitors for 30 min, then stimulated by vehicle or 1 nM isoproterenol for 2 h. RNA was isolated and UCP1 mRNA was quantified relative to 18S mRNA using RT-PCR as described in Materials and Methods. Data are presented as mean fold over vehicle control ± S.E.M. (n=3), and statistical analyses were performed by One-way ANOVA with Dunnet post hoc test: \*p<0.05 versus vehicle in each group.

*Molecular Pharmacology*

**PDE3B, PDE4, and PDE8A Cooperatively Regulate cAMP-dependent Processes in Mouse Brown Adipose Tissue**

Stephen M. Kraynik, Robert S. Miyaoka, Joseph A. Beavo

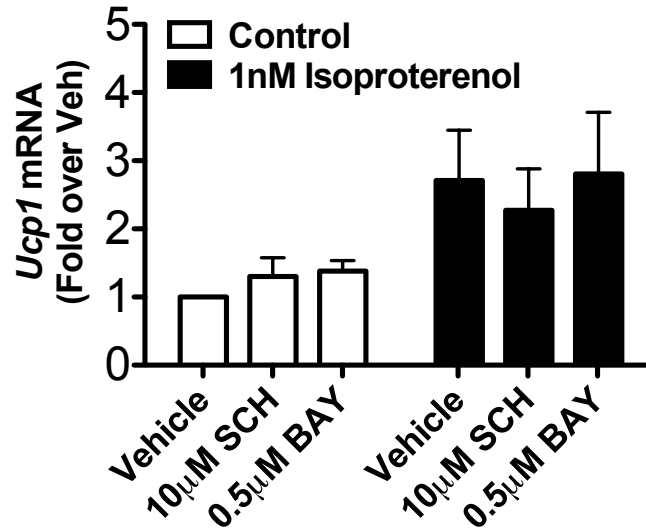

**Supplemental Figure S4. PDE1 or PDE2 inhibitors did not potentiate isoproterenol-stimulated UCP1 mRNA induction.** Differentiated brown adipocyte precursors were pretreated with 10 µM SCH51866 or 0.5 µM BAY 60-7550 for 30 min, then stimulated with 1 nM Isoproterenol for 4 h. RNA was isolated and UCP1 mRNA was quantified relative to 18S mRNA as a reference using RT-PCR as described in materials and methods. Data are presented as mean fold over vehicle control ± S.E.M (n=3).

***Molecular Pharmacology***

**PDE3B, PDE4, and PDE8A Cooperatively Regulate cAMP-dependent Processes in Mouse Brown Adipose Tissue**

Stephen M. Kraynik, Robert S. Miyaoka, Joseph A. Beavo

**A.**

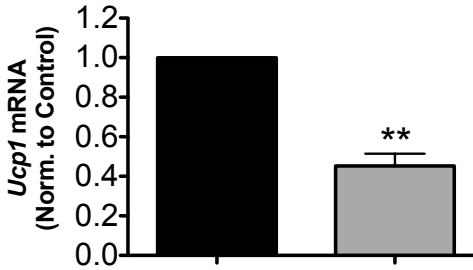

|                        |   |   |
|------------------------|---|---|
| 10 $\mu$ M Cilostamide | + | + |
| 10 $\mu$ M Rolipram    | + | + |
| 1 mM Rp-8-Br-cAMPS     | - | + |

**B.**

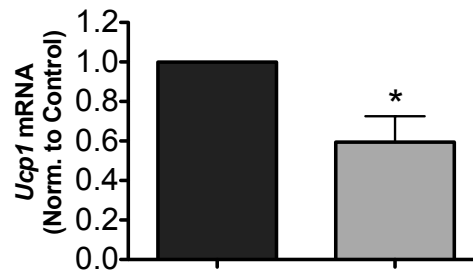

|                        |   |   |
|------------------------|---|---|
| 10 $\mu$ M Cilostamide | + | + |
| 1 nM Isoproterenol     | + | + |
| 1 mM Rp-8-Br-cAMPS     | - | + |

**Supplemental Figure S5. The selective PKA antagonist, Rp-8-Br-cAMPS inhibited UCP1 mRNA induction by PDE inhibitors.**

Differentiated brown adipocyte precursors were pretreated with vehicle or 1 mM Rp-8-Br-cAMPS for 60 min, followed by [A] 10  $\mu$ M cilostamide and 10  $\mu$ M rolipram or [B] 10  $\mu$ M cilostamide alone for 30 minutes, and finally stimulated with vehicle or 1 nM Isoproterenol for 4 h (n=4). RNA was isolated and UCP1 mRNA was quantified relative to 18S mRNA as a reference using RT-PCR as described in materials and methods. Data are presented as mean fold over vehicle control  $\pm$  S.E.M., and statistical analyses were performed by paired Student's t-test:

\*\*p<0.01, \*p<0.05 versus control.

*Molecular Pharmacology*

**PDE3B, PDE4, and PDE8A Cooperatively Regulate cAMP-dependent Processes in Mouse Brown Adipose Tissue**

Stephen M. Kraynik, Robert S. Miyaoka, Joseph A. Beavo

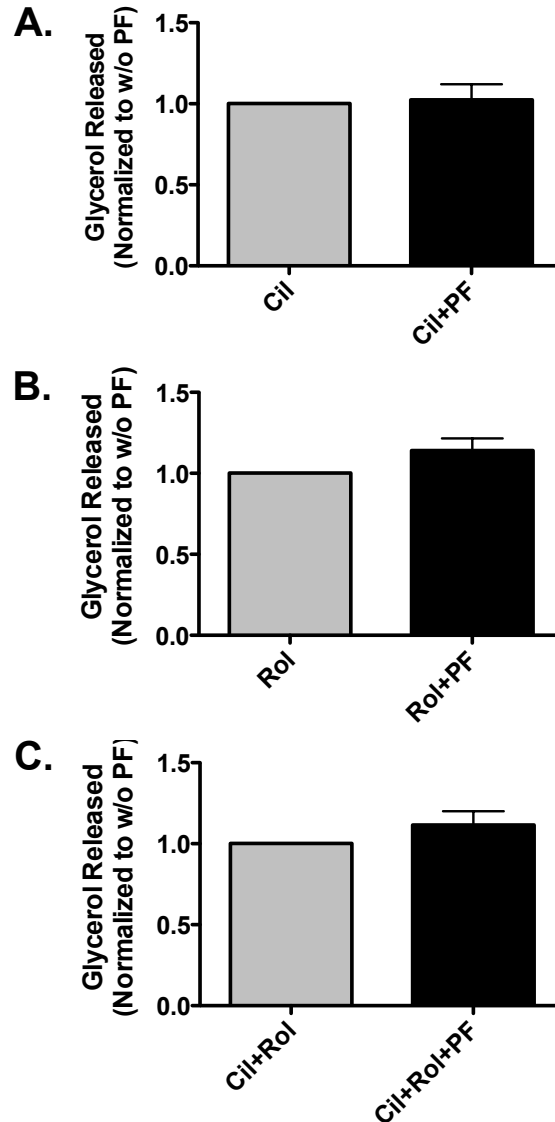

**Supplemental Figure S6. PF-04957325 did not potentiate glycerol release when combined with cilostamide, rolipram or both in primary mouse brown adipocytes.**

Primary mouse brown adipocytes were treated for 80 minutes with: [A] 10  $\mu$ M cilostamide +/- 200nM PF, [B] 10  $\mu$ M rolipram +/- 200nM PF, or [C] both 10  $\mu$ M cilostamide and 10 $\mu$ M rolipram +/- 200nM PF while shaking for 90 cycles/min at 37°C (n=3). Glycerol was measured as described in Materials and Methods. Data are normalized to the amount of glycerol released by PDE inhibitors in the absence of PF, and presented as mean  $\pm$  S.E.M.

## *Molecular Pharmacology*

# PDE3B, PDE4, and PDE8A Cooperatively Regulate cAMP-dependent Processes in Mouse Brown Adipose Tissue

Stephen M. Kraynik, Robert S. Miyaoka, Joseph A. Beavo

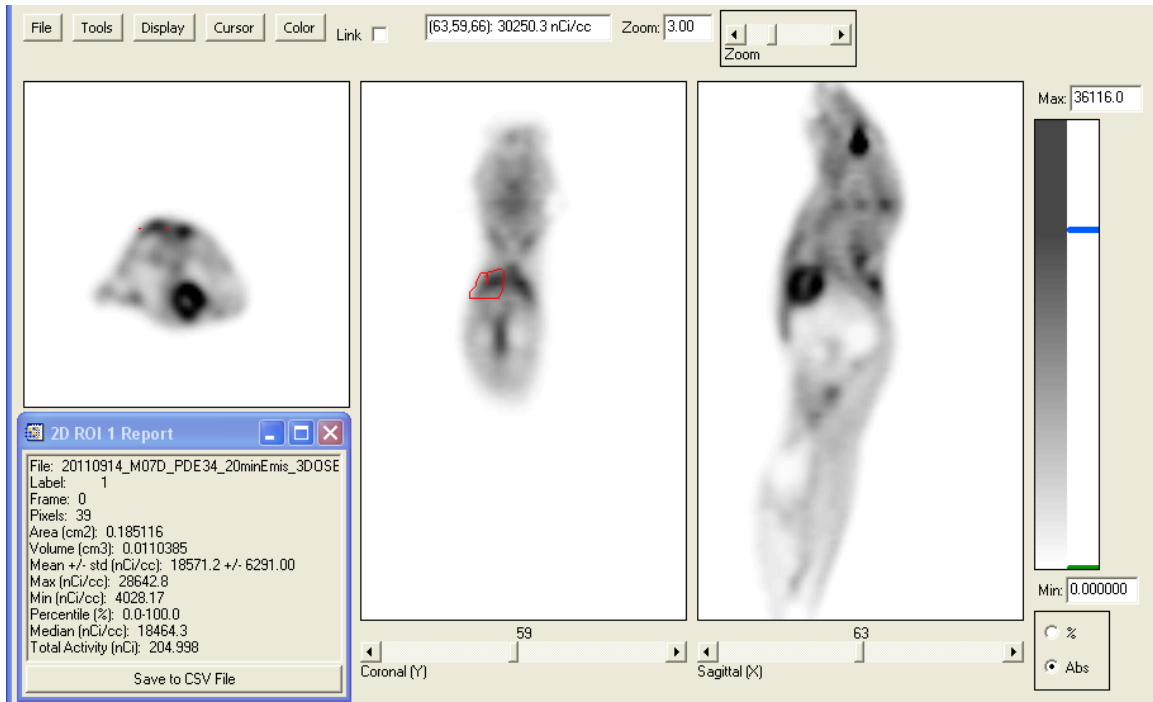

**Supplementary Figure S7. FDG uptake was quantified using Siemens's ASPIRO analysis software.** Shown is a screen capture image of a typical ASPIRO analysis of a mouse injected with FDG. A region of interest was drawn around the left (red trace) and right halves of the interscapular brown adipose tissue in a coronal plane that represented the center of BAT glucose uptake. The maximum activity concentrations [Max (nCi/cc)] between the two regions were averaged and used to calculate the SUV for each animal as described in Materials and Methods.

***Molecular Pharmacology***

**PDE3B, PDE4, and PDE8A Cooperatively Regulate cAMP-dependent Processes in Mouse Brown Adipose Tissue**

Stephen M. Kraynik, Robert S. Miyaoka, Joseph A. Beavo

**Supplemental Table 1 – Primer Sequences for RT-PCR**

| <b>Primer Name</b>     | <b>Sequence 5' -&gt; 3'</b> |
|------------------------|-----------------------------|
| PDE1A forward:         | GGGCATTTTCAGCAAATTTAA       |
| PDE1A reverse:         | CAGCTGCATGGAGTATCAGG        |
| PDE1B forward:         | CCAGCAAGTGAAGACTATGAAGA     |
| PDE1B reverse:         | CTGATGTCAGCAGCATGAAG        |
| PDE1C forward:         | TTGAGATGGTAATGGCCACA        |
| PDE1C reverse:         | ATAAGGCTTTTCGGCTTCTCA       |
| PDE2A forward:         | GGCTGCAATATCTTTGACCA        |
| PDE2A reverse:         | GTGGTGTGCCAGGTCTGTAG        |
| PDE3A forward:         | CGACTCCGATTCTGACAGTG        |
| PDE3A reverse:         | ATATTCCCAGACAGGCATCC        |
| PDE3B forward:         | ACGGAAACCAAAGCAGATTC        |
| PDE3B reverse:         | GCAGCCATAACTCATATCTGGA      |
| PDE4A forward:         | CAAGCGCCAGAAGCAGAG          |
| PDE4A reverse:         | CATAGTCTTCAGGTCAGCCAGA      |
| PDE4B forward:         | AATGTGGCTGGGTACTCACA        |
| PDE4B reverse:         | AAGGTGTCAGATGAGATTTTAAACG   |
| PDE4C forward:         | ATGGGGACTTGATGTGTTCA        |
| PDE4C reverse:         | TCTTGAGGAGGTCTCGTTCC        |
| PDE4D forward:         | CGTTTTCCGAATAGCAGAGC        |
| PDE4D reverse:         | TTTTAAACGTTTTTAAACAAATCTCG  |
| PDE5A forward:         | AAATCAATTCAGTTTTGAAGATCC    |
| PDE5A reverse:         | TGTTGAATAGGCCAGGGTTT        |
| PDE6A forward:         | CCAGGAGTGGACCCAGTACA        |
| PDE6A reverse:         | GGTTTGGTGTGGCTGAGAG         |
| PDE6B forward:         | TGAAGATAAGAAGAGTTGGGTTG     |
| PDE6B reverse:         | AGCAGACAGGTCACATGCAG        |
| PDE6C forward:         | CGAGCAGATGCAAAGTGAAG        |
| PDE6C reverse:         | CAGACAGGTCACAGGCAGTC        |
| PDE7A forward:         | AAAGGTGACTTACACCTTGACGA     |
| PDE7A reverse:         | CCAGTTCGACATGGGTTAC         |
| PDE7B forward:         | AAAGCTCACCTCCACAATAAAGA     |
| PDE7B reverse:         | GGATTGCAATGTCAGCACA         |
| PDE8A forward:         | GACAGAAACACCTGCAGCA         |
| PDE8A reverse:         | GTTAGGCAGGTCAACGAAG         |
| PDE8B forward:         | GTGACTCCGGGGACAACCTCT       |
| PDE8B reverse:         | TGCCCCGAGAAGATATTGAT        |
| PDE9A forward:         | AATTTTGACTGCAGCAACGAG       |
| PDE9A reverse:         | ACCTCCATGGGACGGACT          |
| PDE10A forward:        | TACCAGACAGGGTCGCTGA         |
| PDE10A reverse:        | TGGCCATAGTTTGGTCACAG        |
| PDE11A forward:        | CGAGCTTGTGAGGAAAGGAG        |
| PDE11A reverse:        | ACGGCTCCAAGGTCACAG          |
| UCP1 forward:          | CGATGTCCATGTACACCAAGGA      |
| UCP1 reverse:          | TCGCAGAAAAGAAGCCACAA        |
| PGC1 $\alpha$ forward: | GCTTTGAAGTTTTTGGTAAA        |
| PGC1 $\alpha$ reverse: | ACGGTAGGTGATGAAACCATAGC     |
| 18S forward:           | GTAACCCGTTGAACCCATT         |
| 18S reverse:           | CCATCCAATCGGTAGTAGCG        |
